# Supplementary material
Source: PubMed Central journal article supplement (PMC3174326)
Supplement: NIHMS317982-supplement-1_si_001.pdf [file NIHMS317982-supplement-1_si_001.pdf]

## Supplementary Material

### Design and characterization of a potent and selective dual ATP- and substrate-competitive sub-nanomolar bi-dentate c-Jun N-terminal Kinase (JNK) inhibitor.

John L. Stebbins<sup>1#</sup>, Surya K. De<sup>1#</sup>, Petra Pavlickova<sup>1</sup>, Vida Chen<sup>1</sup>, Thomas Machleidt<sup>2</sup>, Li-Hsing Chen<sup>1</sup>, Christian Kuntzen<sup>3</sup>, Shinichi Kitada<sup>1</sup>, Michael Karin<sup>3</sup> and Maurizio Pellecchia<sup>1\*</sup>

<sup>1</sup> *Infectious and Inflammatory Disease Center, Cancer Center,*

*Sanford-Burnham Medical Research Institute,*

*10901 N. Torrey Pines Road, La Jolla, CA 92037*

<sup>2</sup> *Life Technologies, Discovery and ADMET Services,*

*501 Charmany Drive, Madison, WI 53719*

<sup>3</sup> *Laboratory of Gene Regulation and Signal Transduction,*

*School of Medicine, University of California at San Diego*

*9500 Gilman Drive, MC0723, La Jolla, CA, 92093-0723*

*# These authors made equal contributions to this work.*

\*Corresponding author. E-mail: [mpellecchia@sanfordburnham.org](mailto:mpellecchia@sanfordburnham.org)  
Phone: 858-646-3159; Fax: 858-795-5225

**Figure S1:** Scheme for the synthesis of and analytical data for **19**

**Figure S2:** **9** analytical data

**Table S1:** Peptide sequences and IC<sub>50</sub> values relative to their ability to displace **20**.

**Table S2:** R<sup>2</sup> values for various types of inhibition by **19** at either substrate or ATP binding site.

**Figure S1:** Scheme for the synthesis of and analytical data for **19**

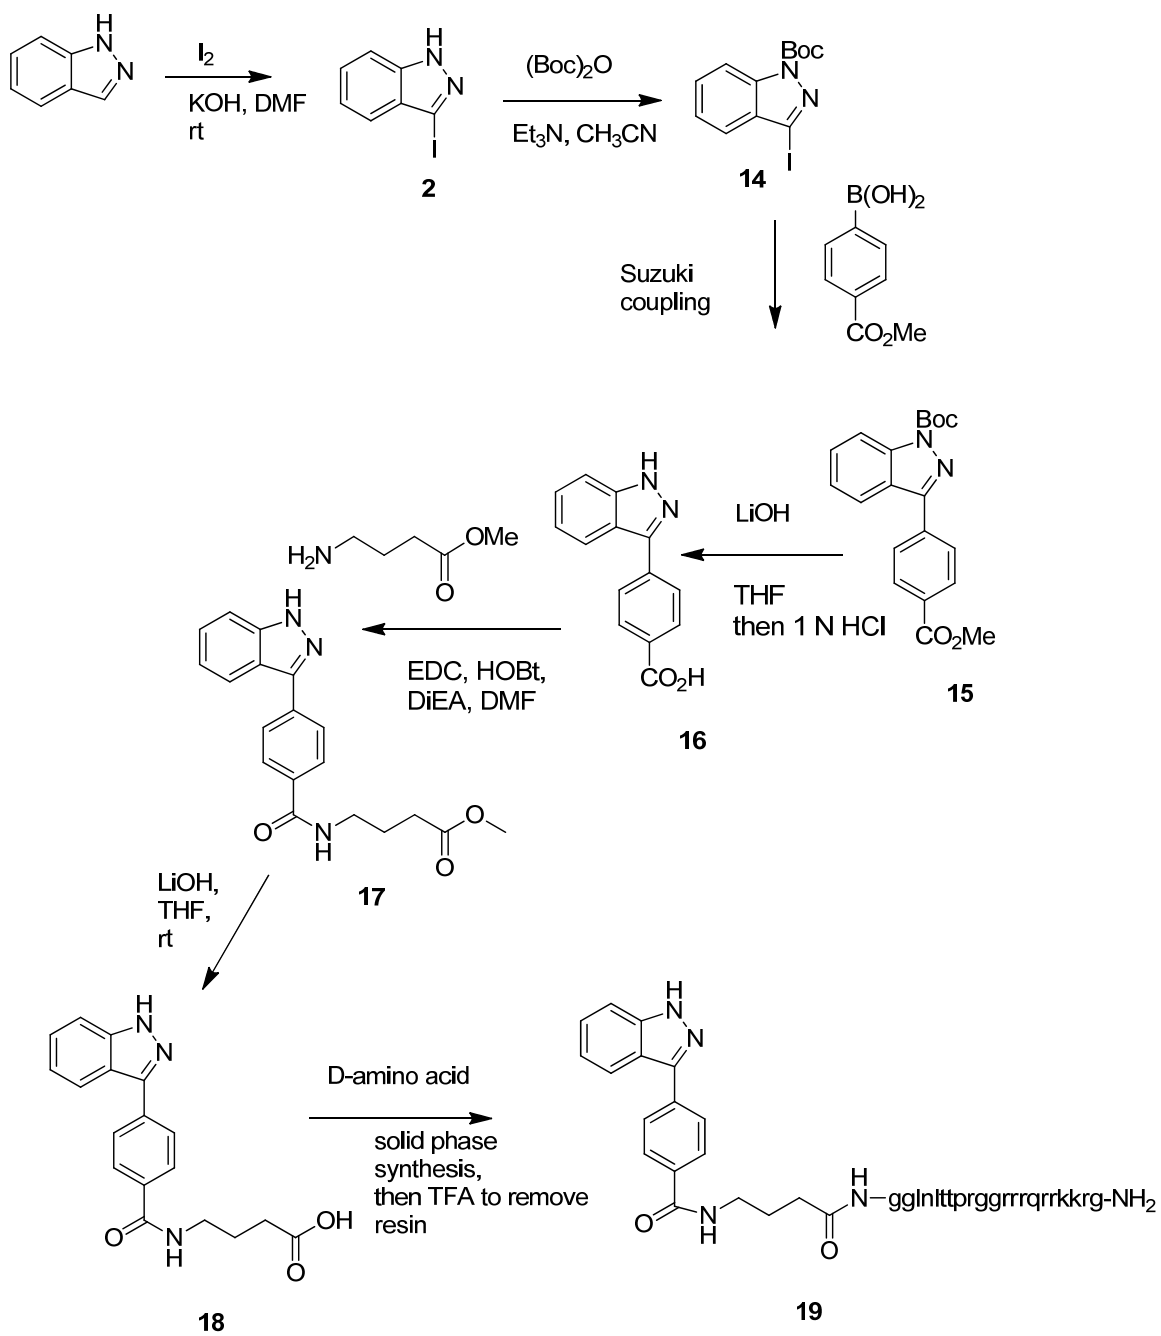

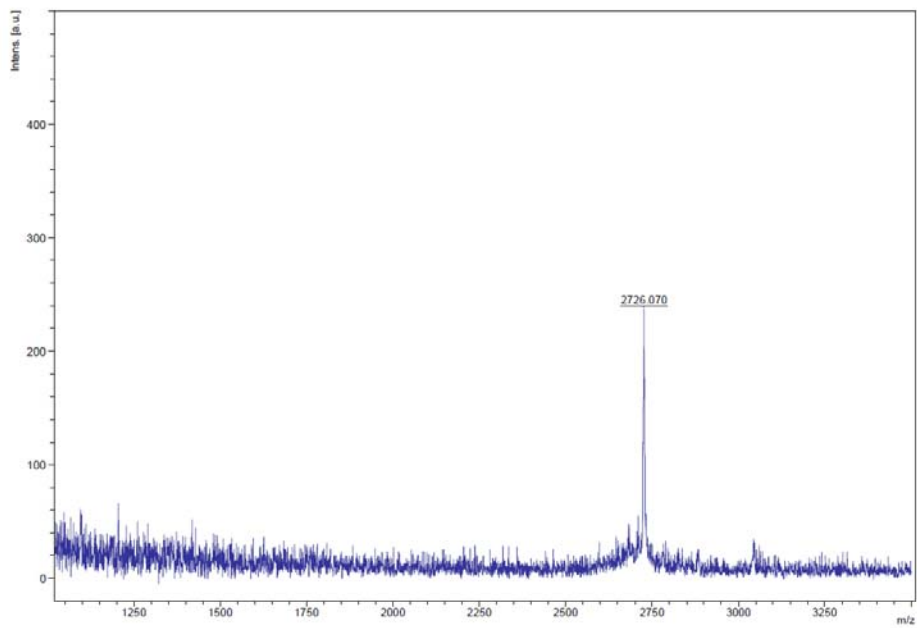

**MALDI-Mass for 19**

burnham

Project Name: J20090707  
Reported by User: System

Breeze

### SAMPLE INFORMATION

|                   |               |                  |                        |
|-------------------|---------------|------------------|------------------------|
| Sample Name:      | BI87G9        | Acquired By:     | System                 |
| Sample Type:      | Unknown       | Date Acquired:   | 6/30/2010 12:44:26 PM  |
| Vial:             | 55            | Acq. Method:     | Burnham 5_95%B ACN 220 |
| Injection #:      | 1             | Date Processed:  | 6/30/2010 1:21:26 PM   |
| Injection Volume: | 10.00 ul      | Channel Name:    | 2487Channel 2          |
| Run Time:         | 20.00 Minutes | Sample Set Name: | VIDA                   |

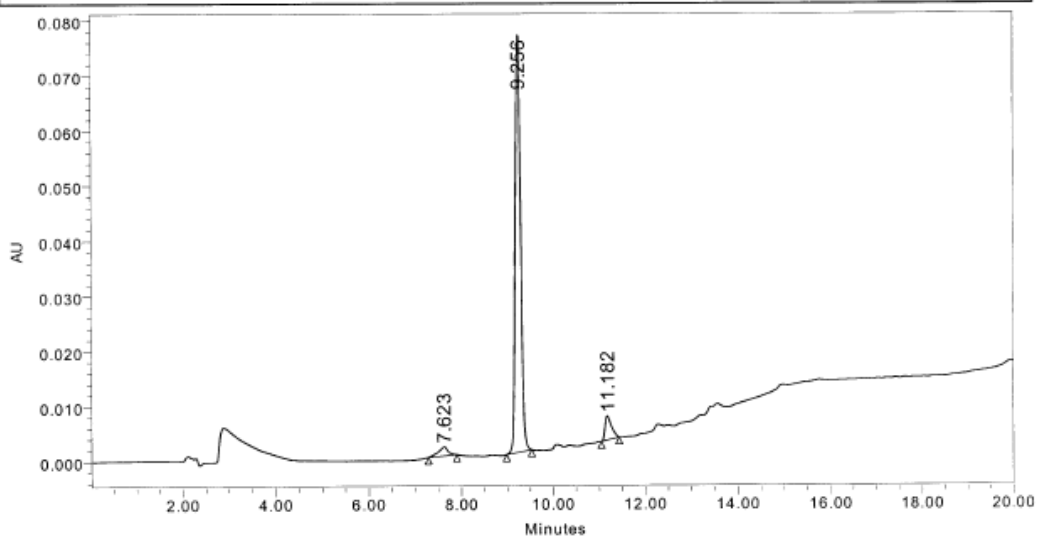

|   | RT (min) | Area ( $\mu\text{V}^2\text{sec}$ ) | % Area | Height ( $\mu\text{V}$ ) | % Height |
|---|----------|------------------------------------|--------|--------------------------|----------|
| 1 | 7.623    | 22986                              | 3.39   | 1656                     | 2.02     |
| 2 | 9.256    | 611885                             | 90.36  | 76049                    | 92.65    |
| 3 | 11.182   | 42319                              | 6.25   | 4376                     | 5.33     |

### HPLC Trace for 19

Figure S2. MS spectrum and HPLC trace for compound 9

C:\Xcalibur\...Abgent\110628\11052451-1

7/5/2011 12:23:06 PM

11052451-1 #119 RT: 2.04 AV: 1 NL: 3.24E7

F: {0,1} + c ESI |corona sid=70.00 det=1106.00 Full ms [250.00-2000.00]  
602.77

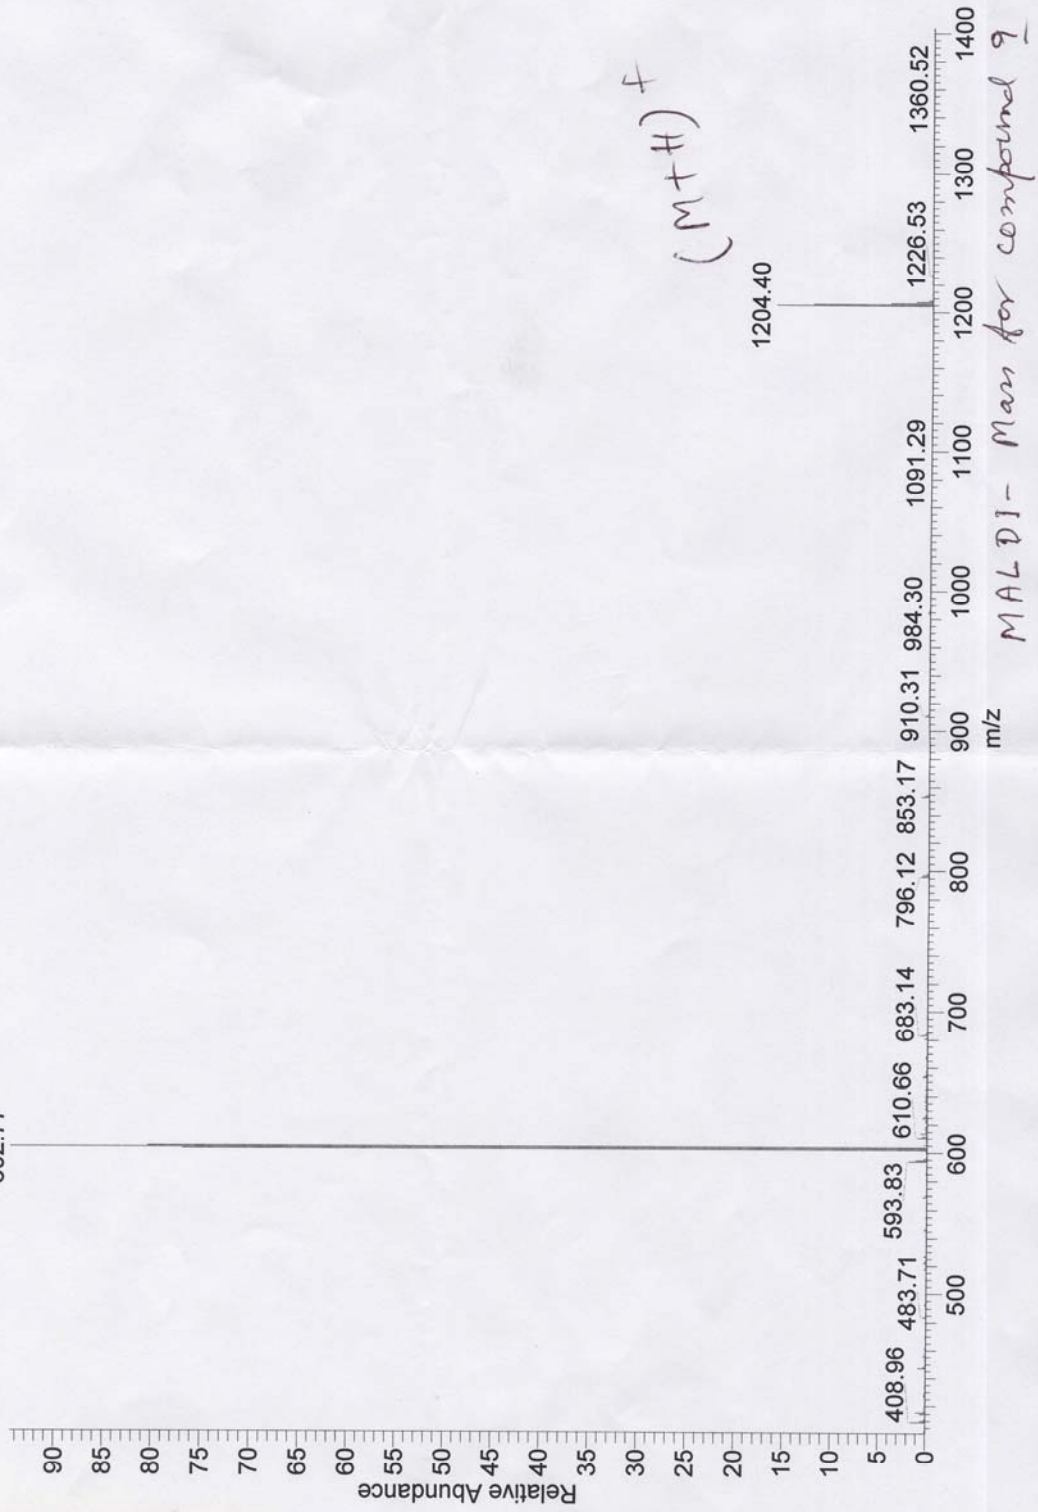

### M-8000 LC/3DQ-MS System Manager Quantitative Report

Analyzed: 07/05/11 09:26 AM  
Data Path: C:\PROGRAM FILES\LCMS\1106\_LCM\DATA\0334  
System: Sys 1  
Application: 1106\_LCMS  
Vial Number: 1  
Vial Type: UNK  
Injection from this vial: 1 of 1

Reported: 07/05/11 10:32 AM  
Processing Method: 10-70 LC  
Series: 0334  
Sample Name: 11052451  
Volume: 20.0 ul  
Sample Description:

Chrom Type: IFM, Channel 2

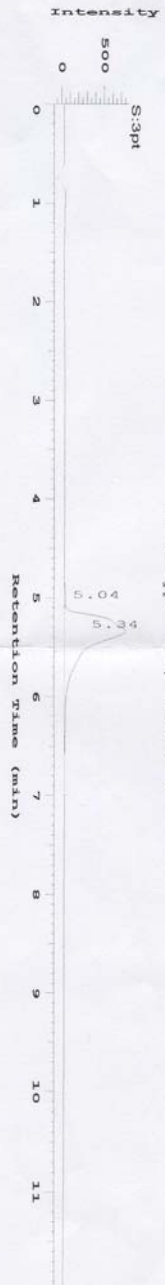

Peak Quantitation: AREA

Calculation Method: AREA%

| No. | RT   | Area     | BC | Conc 1  | Experiment | Target | Name |
|-----|------|----------|----|---------|------------|--------|------|
| 1   | 5.04 | 109021   | BV | 0.737   |            |        |      |
| 2   | 5.34 | 14676199 | VB | 99.263  |            |        |      |
|     |      | 14785220 |    | 100.000 |            |        |      |

Peak rejection level: 0

*HPPLC Trace for compound 9*

**TABLE S1:** Peptide sequences and IC<sub>50</sub> values relative to their ability to displace **20**.

| <b>Protein</b>          | <b>Consensus Sequence</b>                                   | <b>DELFA IC<sub>50</sub></b> |
|-------------------------|-------------------------------------------------------------|------------------------------|
| c-Jun                   | I <sub>33</sub> -LKQSMTLNLA <sub>43</sub>                   | 50 μM                        |
| JunB                    | K <sub>33</sub> -LLKPTLALNLA <sub>44</sub>                  | >100 μM                      |
| JunD                    | L <sub>50</sub> -KKDALTLSLA <sub>60</sub>                   | >100 μM                      |
| ATF2                    | K <sub>46</sub> -HKHEMTLKFG <sub>56</sub>                   | >100 μM                      |
| JDP2                    | G <sub>153</sub> -NLLEQLDKK <sub>163</sub>                  | >100 μM                      |
| Elk-1                   | G <sub>311</sub> -KGRKPDLELP <sub>321</sub>                 | >100 μM                      |
| Net                     | S <sub>221</sub> -AKISLMLPNA <sub>233</sub>                 | >100 μM                      |
| HSF1                    | G <sub>204</sub> -VKKIPLMLND <sub>215</sub>                 | >100 μM                      |
| c-Myc                   | C <sub>171</sub> -STSSLYLQDLSAAASE <sub>187</sub>           | 4 μM                         |
| p53                     | V <sub>97</sub> -PSQKTYHGSGFRLGFLHSG <sub>117</sub>         | >100 μM                      |
| NFATc3                  | P <sub>136</sub> -EREFLERPSRDHLYLPLEPSYRESSL <sub>162</sub> | 3 μM                         |
| NFATc1-α                | L <sub>126</sub> -GLYHNNNQFFHD <sub>138</sub>               | >100 μM                      |
| Glucocorticoid receptor | A <sub>574</sub> -WRIMTLNML <sub>584</sub>                  | >100 μM                      |
| Itch                    | R <sub>595</sub> -RRLWVIFPG <sub>604</sub>                  | >100 μM                      |
| IRS-1                   | R <sub>849</sub> -LARPTRLSLG <sub>859</sub>                 | 14 μM                        |
| <b>JIP1</b>             | <b>R<sub>154</sub>-PKRPTTLNLF<sub>164</sub></b>             | <b>0.3 μM</b>                |
| JIP2                    | H <sub>134</sub> -KHRPTTLRLT <sub>144</sub>                 | 7 μM                         |
| JIP3                    | R <sub>202</sub> -KERPTSLNVF <sub>212</sub>                 | 7 μM                         |
| β-Arrestin 2            | L <sub>192</sub> -MSDRSLHLE <sub>202</sub>                  | >100 μM                      |
| Sab                     | A <sub>310</sub> -VVRPGSLDLR <sub>320</sub>                 | 3 μM                         |



**TABLE S2:** R<sup>2</sup> values for various types of inhibition by **19** at either substrate or ATP binding site.

|                        | <b>ATF2</b> | <b>ATP</b> |
|------------------------|-------------|------------|
| <b>Competitive</b>     | 0.96        | 0.95       |
| <b>Mixed</b>           | 0.96        | 0.96       |
| <b>Un-Competitive</b>  | 0.76        | 0.86       |
| <b>Non-Competitive</b> | 0.83        | 0.91       |

**Synthesis of 3-Iodo-1H-indazole (2).** Indazole was commercially available, which was iodinated according to the reported procedures to give product **2**.<sup>1,2</sup>

**Synthesis of *tert*-Butyl-3-iodo-1H-indazole-1-carboxylate (14).** To a solution of **2** (3.66 g, 15 mmol) in CH<sub>3</sub>CN (30 mL) were added Et<sub>3</sub>N (3.13 mL, 22.5 mmol) and DMAP (90 mg, 0.75 mmol, 5 mol%) at room temperature under nitrogen atmosphere. After 10 min, (Boc)<sub>2</sub>O (3.59 g, 16.5 mmol) was added to the reaction mixture. The resulting reaction mixture was stirred at room temperature for 10 h, then the solvent and triethyl amine were removed in vacuo. The residue was extracted with ether (200 mL), and washed with brine (2 × 50 mL), dried (MgSO<sub>4</sub>), and then concentrated. The residue was chromatographed over silica gel (5% ethyl acetate in hexane) to give the pure product **14** (5.14 g, 92%).<sup>1</sup>H NMR (300 MHz, CDCl<sub>3</sub>) δ 1.72 (s, 9 H), 7.37 (t, *J* = 8.1 Hz, 1 H), 7.49 (d, *J* = 8.1 Hz, 1 H), 7.58 (t, *J* = 7.5 Hz, 1 H), 8.11 (d, *J* = 8.7 Hz, 1 H). MS *m/z* 367 (M + Na)<sup>+</sup>, 345 (M + H)<sup>+</sup>, 310, 289, 244, 124, 74, 56. HRMS calcd for C<sub>12</sub>H<sub>14</sub>IN<sub>2</sub>O<sub>2</sub> (M + H) 345.0100, found 345.0095.

**Synthesis of *tert*-Butyl-3-(4-(methoxycarbonyl)phenyl)-1H-indazole-1-carboxylate (15).** A mixture of **14** (344 mg, 1 mmol), 4-methoxycarbonylphenyl boronic acid (271 mg,

1.5 mmol), Pd(dppf)Cl<sub>2</sub> (82 mg, 0.1 mmol), and saturated aqueous Na<sub>2</sub>CO<sub>3</sub> solution (4 mL) in ethanol (1 mL) and toluene (10 mL) was stirred at 80 °C for 12 h. After completion of reaction (TLC), the reaction mixture was extracted with CH<sub>2</sub>Cl<sub>2</sub> (3 × 50 mL). The combined organic layers were washed with saturated NaHCO<sub>3</sub> solution (50 mL), water (50 mL), and brine (50 mL), dried (MgSO<sub>4</sub>), and concentrated in vacuo. The residue was chromatographed over silica gel (10% ethyl acetate in hexane) to give the pure product **15** (228 mg, 65%). <sup>1</sup>H NMR (300 MHz, CDCl<sub>3</sub>) δ: 1.76 (s, 9 H), 4.97 (s, 3 H), 7.40 (t, *J* = 7.5 Hz, 1 H), 7.58 (t, *J* = 8.1 Hz, 1 H), 7.99 (d, *J* = 8.1 Hz, 1 H), 8.10 (d, *J* = 8.1 Hz, 2 H), 8.15 - 8.26 (m, 3 H). MS *m/z* 375 (M + Na)<sup>+</sup>, 353 (M + H)<sup>+</sup>, 311, 297, 253, 241, 163, 122, 74, 56. HRMS calcd for C<sub>20</sub>H<sub>21</sub>N<sub>2</sub>O<sub>4</sub> (M + H) 353.1501, found 353.1491.

**Synthesis of 4-(1*H*-Indazol-3-yl)benzoic acid (16).** To a solution of compound **15** (400 mg, 1.136 mmol) in THF (5 mL) and methanol (1 mL) was added LiOH solution (272 mg, 11.36 mmol) in water (3 mL). The resulting reaction mixture was stirred at room temperature for 18 h. After completion of the reaction, the reaction mixture was acidified with 3 N HCl and stirred for 2 h to remove the boc-group at the same pot. The reaction mixture was extracted with CH<sub>2</sub>Cl<sub>2</sub> (3 × 50 mL). The combined organic layers were dried over MgSO<sub>4</sub> and concentrated in vacuo. The residue was chromatographed over silica gel (5% methanol in dichloromethane) to afford the acid **16** (242 mg, 90%). <sup>1</sup>H NMR (300 MHz, DMSO-*d*<sub>6</sub>) δ: 7.25 (t, *J* = 7.5 Hz, 1 H), 7.43 (t, *J* = 6.9 Hz, 1 H), 7.63 (d, *J* = 8.1 Hz, 1 H), 8.02-8.18 (m, 5 H). MS *m/z* 239 (M + H)<sup>+</sup>, 201, 158, 129, 102, 84, 56. HRMS calcd for C<sub>14</sub>H<sub>11</sub>N<sub>2</sub>O<sub>2</sub> (M + H) 239.0821, found 239.0820.

**Synthesis of Methyl-4-(4-(1*H*-indazol-3-yl)benzamido)butanoate (17).** To a solution of **16** (170 mg, 0.714 mmol) in DMF (3 mL) were added EDC (163 mg, 0.856 mmol), HOBT (120 mg, 0.856 mmol), DIEA (0.38 mL, 2.142 mmol), and amine (121 mg, 0.785 mmol) at room temperature. The resulting reaction mixture was stirred at room temperature for 20 h. The reaction mixture was diluted with water (40 mL) followed by extraction with ethyl acetate (3 × 40 mL). The combined organic layers were washed with saturated NaHCO<sub>3</sub> solution (2 × 30 mL), water (3 × 30 mL), and brine (30 mL) successively, dried (MgSO<sub>4</sub>), and then concentrated in vacuo. The residue was chromatographed over silica gel (60% ethyl acetate in hexane) to give the pure product **17** (151 mg, 62%). <sup>1</sup>H NMR (300 MHz, DMSO-*d*<sub>6</sub>) δ: 1.82 (quintet, *J* = 7.5 Hz, 2H), 2.39 (t, *J* = 7.5 Hz, 2 H), 3.31 (q, *J* = 6 Hz, 2 H), 7.24 (t, *J* = 7.5 Hz, 1 H), 7.42 (t, *J* = 6.9 Hz, 1 H), 7.62 (d, *J* = 8.4 Hz, 1H), 7.99 (d, *J* = 8.4 Hz, 2 H), 8.05-8.16 (m, 3 H), 8.58 (t, *J* = 5.1 Hz, 1 H, NH). MS *m/z* 360 (M + Na)<sup>+</sup>, 338 (M + H)<sup>+</sup>, 266, 221, 186, 175, 102, 49. HRMS calcd for C<sub>19</sub>H<sub>20</sub>N<sub>3</sub>O<sub>3</sub> (M + H) 338.1499, found 338.1505.

**Synthesis of 4-(4-(1*H*-Indazol-3-yl)benzamido)butanoic acid (18).** To a solution of compound **17** (140 mg, 0.415 mmol) in THF (3 mL) and methanol (1 mL) was added LiOH solution (102 mg, 4.15 mmol) in water (2 mL). The resulting reaction mixture was stirred at room temperature for 18 h. After completion of the reaction, the reaction mixture was acidified with 3 N HCl followed by extraction with CH<sub>2</sub>Cl<sub>2</sub> (3 × 50 mL). The combined organic layers were dried over MgSO<sub>4</sub> and concentrated in vacuo. The residue was chromatographed over silica gel (10% methanol in dichloromethane) to afford the acid **18** (122 mg, 91%). <sup>1</sup>H NMR (300 MHz, DMSO-*d*<sub>6</sub>) δ: 1.78 (quintet, *J* = 7.2 Hz, 2 H), 2.30 (t, *J* = 7.2 Hz, 2 H), 3.29 (q, *J* = 6 Hz, 2 H), 7.24 (t, *J* = 7.5 Hz, 1 H), 7.40 (t, *J* = 7.8 Hz, 1 H), 7.62 (d, *J* = 8.7

Hz, 1 H), 7.98 (d,  $J = 8.1$  Hz, 2 H), 8.02-8.16 (m, 3 H), 8.56 (t,  $J = 5$  Hz, 1 H, NH). MS  $m/z$  346 (M + Na)<sup>+</sup>, 324 (M + H)<sup>+</sup>, 221, 186, 130, 83. HRMS calcd for C<sub>18</sub>H<sub>18</sub>N<sub>3</sub>O<sub>3</sub> (M + H) 324.1343, found 324.1351.

## References

- (1) Collot, V.; Dallemagne, P.; Bovy, P. R.; Rault, S. Suzuki-type crosscoupling reaction of 3-iodoindazoles with aryl boronic acids: A general and flexible route to 3-arylidazoles. *Tetrahedron* **1999**, *55*, 6917–6922.
- (2) Collot, V.; Bovy, P. R.; Rault, S. Heck cross-coupling reaction of 3-iodoindazoles with methyl acrylate: a mild and flexible strategy to design 2-aza tryptamines. *Tetrahedron Lett.* **2000**, *41*, 4363–4366.
